# Supplementary material for: Urban Stormwater Resilience Assessment Method Based on Cloud Model and TOPSIS
Source: MDPI journal article supplement (doi:10.3390/ijerph19010038), 2021-12-21
Supplement: s1 [file s1]

The C<sub>2</sub> value standard of flood control embankment length: whether the total length of urban flood control embankment conforms to the design code of urban flood control embankment.

**Table S1.**Fuzzy description of the length of the levee

| Length of the levee C <sub>2</sub>     | Scoring criteria             | Score |
|----------------------------------------|------------------------------|-------|
| Level 1: The worst plan Y <sup>-</sup> | Length<10km                  | 1     |
| Level 2                                | Length between 10km and 15km | 2     |
| Level 3                                | Length between 16km and 12km | 3     |
| Level 4: The best plan Y <sup>+</sup>  | Length>20km                  | 4     |

Criteria for the C<sub>3</sub> value of drainage pipe length: whether the total length of drainage pipe conforms to the urban drainage engineering planning standards.

**Table S2.**Fuzzy description of drainage pipe length

| Length of the drainage pipe C <sub>3</sub> | Scoring criteria                   | Score |
|--------------------------------------------|------------------------------------|-------|
| Level 1: The worst plan Y <sup>-</sup>     | Length<5000km                      | 1     |
| Level 2                                    | Length between 5000km and 10000km  | 2     |
| Level 3                                    | Length between 10000km and 15000km | 3     |
| Level 4: The best plan Y <sup>+</sup>      | Length>15000km                     | 4     |

The value standard of pumping and discharging capacity C<sub>4</sub> of central urban water pump: the total pumping and discharging capacity of central urban water pump station.

**Table S3.**Fuzzy description of pumping and discharging capacity of central urban water pump

| Pumping and discharging capacity of central urban water pump C <sub>4</sub> | Scoring criteria                                                                           | Score |
|-----------------------------------------------------------------------------|--------------------------------------------------------------------------------------------|-------|
| Level 1: The worst plan Y <sup>-</sup>                                      | Capacity<400m <sup>3</sup> ·s <sup>-1</sup>                                                | 1     |
| Level 2                                                                     | Capacity between 400m <sup>3</sup> ·s <sup>-1</sup> and 600m <sup>3</sup> ·s <sup>-1</sup> | 2     |
| Level 3                                                                     | Capacity between 600m <sup>3</sup> ·s <sup>-1</sup> and                                    | 3     |

|                              |                                             |   |
|------------------------------|---------------------------------------------|---|
|                              | $800\text{m}^3\cdot\text{s}^{-1}$           |   |
| Level 4: The best plan $Y^+$ | Capacity $>800\text{m}^3\cdot\text{s}^{-1}$ | 4 |

Value standard of road area per capita  $C_5$ : road area per capita calculated according to urban population. The overall well-off target value is  $12\text{m}^2$ .

**Table S4.**Fuzzy description of per capita road area

| Per capita road area $C_5$    | Scoring criteria                                              | Score |
|-------------------------------|---------------------------------------------------------------|-------|
| Level 1: The worst plan $Y^-$ | Per capita road area $<4\text{m}^2$                           | 1     |
| Level 2                       | Per capita road area between $4\text{m}^2$ and $8\text{m}^2$  | 2     |
| Level 3                       | Per capita road area between $8\text{m}^2$ and $12\text{m}^2$ | 3     |
| Level 4: The best plan $Y^+$  | Per capita road area $>12\text{m}^2$                          | 4     |

Average number of students in institutions of higher learning per 10,000 population  
 $C_6$  value standard: number of students in institutions of higher learning per 10,000 population.

**Table S5.**Fuzzy description of the average number of students in institutions of higher learning per 10,000 population

| Average number of students in institutions of higher learning per 10,000 population $C_6$ | Scoring criteria                             | Score |
|-------------------------------------------------------------------------------------------|----------------------------------------------|-------|
| Level 1: The worst plan $Y^-$                                                             | The number of students $<1000$               | 1     |
| Level 2                                                                                   | The number of students between 1000 and 1500 | 2     |
| Level 3                                                                                   | The number of students between 1500 and 2000 | 3     |
| Level 4: The best plan $Y^+$                                                              | The number of students $>2000$               | 4     |

Employment rate  $C_8$  value standard: the proportion of urban employment in the total number of people.

**Table S6.**Fuzzy description of employment rate

| Employment rate $C_8$         | Scoring criteria                    | Score |
|-------------------------------|-------------------------------------|-------|
| Level 1: The worst plan $Y^-$ | Employment rate <70%                | 1     |
| Level 2                       | Employment rate between 70% and 80% | 2     |
| Level 3                       | Employment rate between 80% and 90% | 3     |
| Level 4: The best plan $Y^+$  | Employment rate >90%                | 4     |

The value standard of urban medical insurance popularity  $C_9$ : the proportion of the number of people covered by urban medical insurance to the total urban population.

**Table S7.**Fuzzy description of urban medical insurance popularity

| Urban medical insurance popularity $C_9$ | Scoring criteria               | Score |
|------------------------------------------|--------------------------------|-------|
| Level 1: The worst plan $Y^-$            | Popularity <70%                | 1     |
| Level 2                                  | Popularity between 70% and 80% | 2     |
| Level 3                                  | Popularity between 80% and 90% | 3     |
| Level 4: The best plan $Y^+$             | Popularity >90%                | 4     |

Value standard of  $C_{10}$  for health beds per 1000 population: the number of health beds per 1000 population in medical and health institutions.

**Table S8.**Fuzzy description of sanitary beds per 1000 population

| Sanitary beds per 1000 population $C_{10}$ | Scoring criteria                    | Score |
|--------------------------------------------|-------------------------------------|-------|
| Level 1: The worst plan $Y^-$              | Sanitary bed number <4              | 1     |
| Level 2                                    | Sanitary bed number between 4 and 5 | 2     |
| Level 3                                    | Sanitary bed number between 5 and 6 | 3     |
| Level 4: The best plan $Y^+$               | Sanitary bed number >6              | 4     |

Number of health workers per 1000 population  $C_{11}$  value standard: number of health workers per 1000 population.

**Table S9.**Fuzzy description of the number of health workers per 1,000 population

| Number of health workers per 1,000 population C <sub>11</sub> | Scoring criteria                  | Score |
|---------------------------------------------------------------|-----------------------------------|-------|
| Level 1: The worst plan Y <sup>-</sup>                        | Number of staff<10                | 1     |
| Level 2                                                       | Number of staff between 10 and 15 | 2     |
| Level 3                                                       | Number of staff between 15 and 20 | 3     |
| Level 4: The best plan Y <sup>+</sup>                         | Number of staff>20                | 4     |

Value standard of green coverage rate C<sub>13</sub> of built-up area: the percentage of green coverage area of urban built-up area in built-up area.

**Table S10.**Fuzzy description of greening coverage rate in built-up areas

| Greening coverage rate in built-up areas C <sub>13</sub> | Scoring criteria                                             | Score |
|----------------------------------------------------------|--------------------------------------------------------------|-------|
| Level 1: The worst plan Y <sup>-</sup>                   | Greening coverage rate in built-up areas<20%                 | 1     |
| Level 2                                                  | Greening coverage rate in built-up areas between 20% and 30% | 2     |
| Level 3                                                  | Greening coverage rate in built-up areas between 30% and 40% | 3     |
| Level 4: The best plan Y <sup>+</sup>                    | Greening coverage rate in built-up areas>40%                 | 4     |

Lake-river surface area C<sub>14</sub> value standard: the total surface area of rivers and lakes.

**Table S11.**Fuzzy description of lake and river surface area

| Lake and river surface area C <sub>14</sub> | Scoring criteria                                                            | Score |
|---------------------------------------------|-----------------------------------------------------------------------------|-------|
| Level 1: The worst plan Y <sup>-</sup>      | Lake and river surface area<10km <sup>2</sup>                               | 1     |
| Level 2                                     | Lake and river surface area between 10km <sup>2</sup> and 30km <sup>2</sup> | 2     |
| Level 3                                     | Lake and river surface area between 30km <sup>2</sup> and 50km <sup>2</sup> | 3     |
| Level 4: The best plan Y <sup>+</sup>       | Lake and river surface area>50km <sup>2</sup>                               | 4     |

Paddy area  $C_{15}$  value standard: the size of the land area used for paddy field cultivation in the city.

**Table S12.**Fuzzy description of paddy farmland area

| Paddy farmland area $C_{15}$  | Scoring criteria                                                    | Score |
|-------------------------------|---------------------------------------------------------------------|-------|
| Level 1: The worst plan $Y^-$ | Paddy farmland area $<1000\text{km}^2$                              | 1     |
| Level 2                       | Paddy farmland area between $1000\text{km}^2$ and $2000\text{km}^2$ | 2     |
| Level 3                       | Paddy farmland area between $2000\text{km}^2$ and $3000\text{km}^2$ | 3     |
| Level 4: The best plan $Y^+$  | Paddy farmland area $>3000\text{km}^2$                              | 4     |

Reservoir capacity  $C_{16}$  value standard: urban reservoir total capacity value.

**Table S13.**Fuzzy description of reservoir capacity

| Reservoir capacity $C_{16}$   | Scoring criteria                                                                 | Score |
|-------------------------------|----------------------------------------------------------------------------------|-------|
| Level 1: The worst plan $Y^-$ | Reservoir capacity $<100$ billion $\text{m}^3$                                   | 1     |
| Level 2                       | Reservoir capacity between 100 billion and 250 billion $\text{m}^3$              | 2     |
| Level 3                       | Reservoir capacity between 250 billion $\text{m}^3$ and 500 billion $\text{m}^3$ | 3     |
| Level 4: The best plan $Y^+$  | Reservoir capacity $>500$ billion $\text{m}^3$                                   | 4     |

The value standard of  $C_{17}$  for comprehensive production capacity of water plant: the comprehensive production capacity of urban water plant.

**Table S14.**Fuzzy description of comprehensive production capacity of water plant

| Comprehensive production capacity of water plant $C_{17}$ | Scoring criteria                                                                         | Score |
|-----------------------------------------------------------|------------------------------------------------------------------------------------------|-------|
| Level 1: The worst plan $Y^-$                             | Comprehensive production capacity $<10$ million $\text{t}\cdot\text{d}^{-1}$             | 1     |
| Level 2                                                   | Comprehensive production capacity between 10 million $\text{t}\cdot\text{d}^{-1}$ and 50 | 2     |

|                                       |                                                                                                                |   |
|---------------------------------------|----------------------------------------------------------------------------------------------------------------|---|
|                                       | million t·d <sup>-1</sup>                                                                                      |   |
| Level 3                               | Comprehensive production capacity<br>between 50 million t·d <sup>-1</sup> and 100<br>million t·d <sup>-1</sup> | 3 |
| Level 4: The best plan Y <sup>+</sup> | Comprehensive production<br>capacity>100 million t·d <sup>-1</sup>                                             | 4 |

Wastewater treatment capacity C<sub>18</sub> value standard: sewage treatment plant daily capacity of sewage.

**Table S15.**Fuzzy description of sewage treatment capacity

| Sewage treatment capacity C <sub>18</sub> | Scoring criteria                                                                                                             | Score |
|-------------------------------------------|------------------------------------------------------------------------------------------------------------------------------|-------|
| Level 1: The worst plan Y <sup>-</sup>    | Sewage treatment capacity<2 million<br>m <sup>3</sup> ·d <sup>-1</sup>                                                       | 1     |
| Level 2                                   | Sewage treatment capacity between 2<br>million m <sup>3</sup> ·d <sup>-1</sup> and 3 million m <sup>3</sup> ·d <sup>-1</sup> | 2     |
| Level 3                                   | Sewage treatment capacity between<br>3 million m <sup>3</sup> ·d <sup>-1</sup> and 4 million m <sup>3</sup> ·d <sup>-1</sup> | 3     |
| Level 4: The best plan Y <sup>+</sup>     | Sewage treatment capacity>4 million<br>m <sup>3</sup> ·d <sup>-1</sup>                                                       | 4     |
